# Supplementary material for: A fast room-temperature strategy for direct reduction of graphene oxide films towards flexible transparent conductive films
Source: Royal Society of Chemistry journal article supplement (doi:10.1039/c4ta00527a), 2014-01-01
Supplement: c4ta00527a1.pdf [file c4ta00527a1.pdf]

## Electronic Supplementary Information

### A fast room-temperature strategy for direct reduction of graphene oxide films towards flexible transparent conductive films

Jing Ning,<sup>a,b#</sup> Jie Wang,<sup>a#</sup> Xianglong Li,<sup>a</sup> Tengfei Qiu,<sup>a,b</sup> Bin Luo,<sup>a</sup> Long Hao,<sup>a,b</sup> Minghui Liang,<sup>a</sup>  
Bin Wang<sup>a,b</sup> and Linjie Zhi<sup>\*a</sup>

<sup>a</sup> National Center for Nanoscience and Technology, Beiyitiao No. 11, Zhongguancun, Beijing, 100190, China. Fax: +86 10 82545578; Tel: +86 10 82545578; E-mail: zhilj@nanoctr.cn

<sup>b</sup> University of Chinese Academy of Sciences, Beijing 100039, China

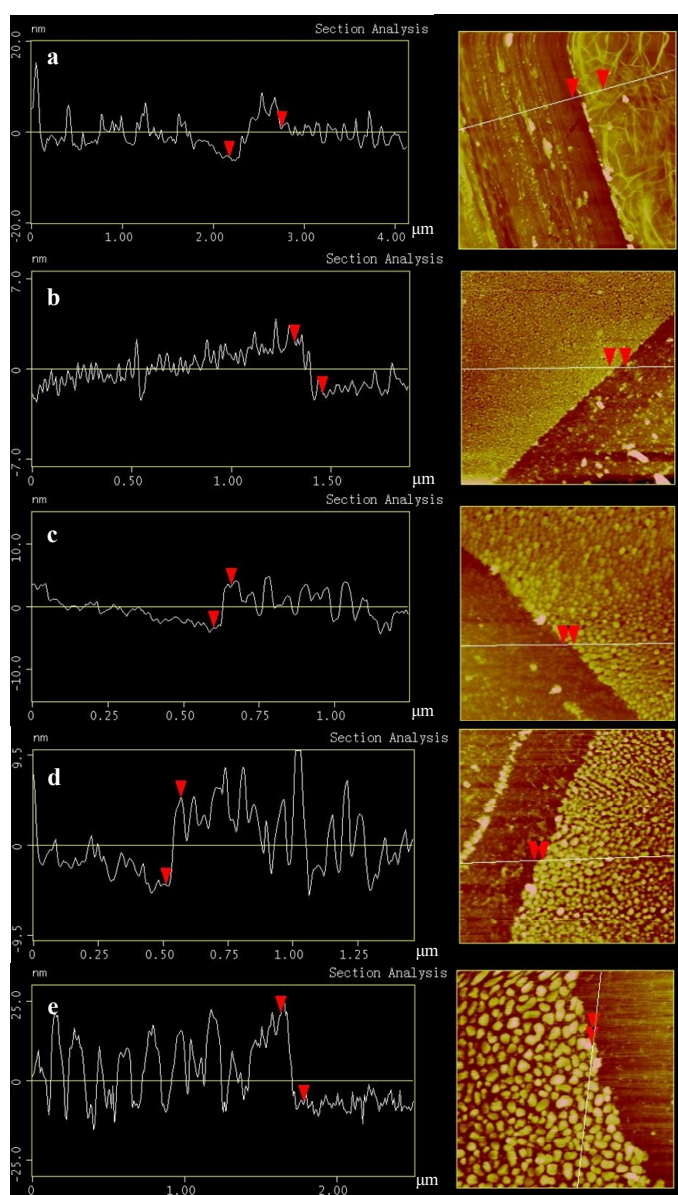

**Figure S1.** The AFM image of a) the GO film of 6.3nm, and b-e) the as-sputtered Sn nanoparticle layer of different thicknesses.

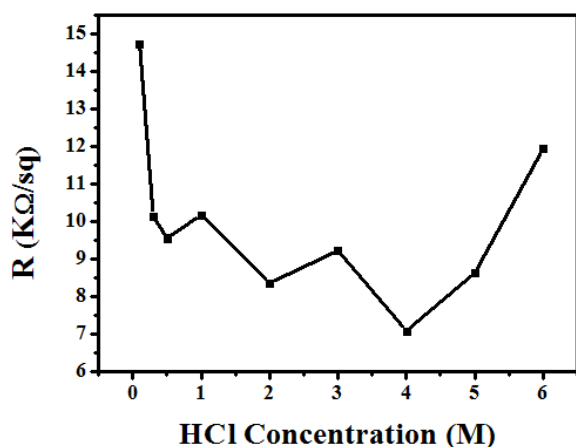

**Figure S2.** The influence of the concentration of the HCl solution to the conductivity of the rGO film.

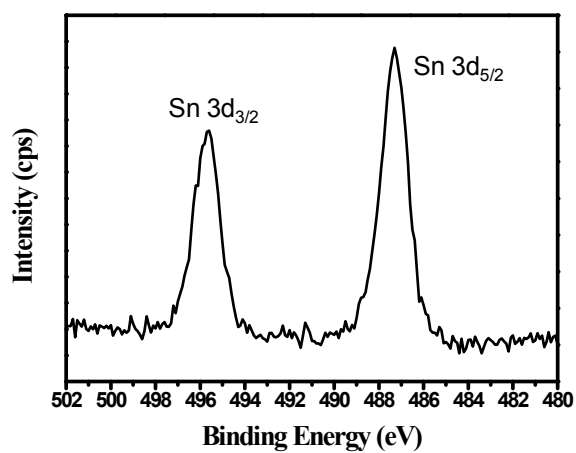

**Figure S3.** Magnified XPS spectrum of Sn 3d in Sn-RGO sample.

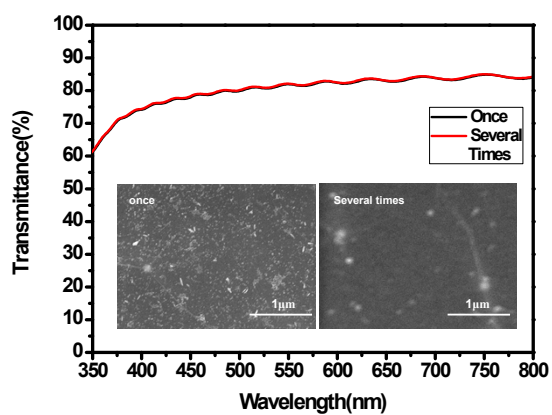

**Figure S4.** The change of morphology and transmittance before and after constantly washing the film.

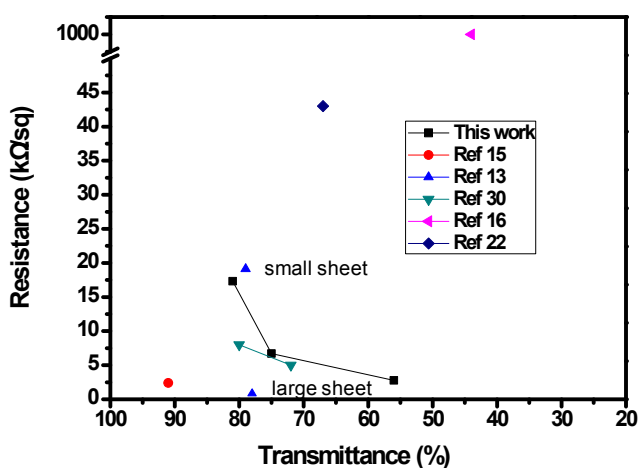

**Figure S5.** Comparison of the conductivity and transparency between the as prepared Sn-rGO and the rGO films fabricated in other methods on flexible substrates.

| Sample      | XPS*       | XRD            | Raman                          | TGA                   |
|-------------|------------|----------------|--------------------------------|-----------------------|
|             | C/O ratios | d spacing (nm) | I <sub>D</sub> /I <sub>G</sub> | Total weight loss (%) |
| GO          | 3.1        | 0.773          | 0.9                            | 60                    |
| Ref 24 (Zn) | 21.2       |                | 1.22                           | 3                     |
| Ref 25 (Fe) | 2.6~7.9    |                | 0.32~1.02                      | 7~34                  |
| Ref 29 (Al) | 18.6       | 0.375          | 1.81                           |                       |
| Ref 23      | 6.67       | 0.362          | 1.10                           | 12.05                 |
| Sn-rGO      | 17.2       | 0.373          | 1.14                           | 15                    |

**Table S1.** Comparison of the property results of the as prepared Sn-rGO film and that from other different reducing methods (mainly metal reduction).
